# Supplementary material for: Delayed evoked potentials in zebra finch ( Taeniopygia guttata ) under midazolam-butorphanol-isoflurane anesthesia
Source: PeerJ journal article supplement (doi:10.7717/peerj.7937), 2019-10-24

A.

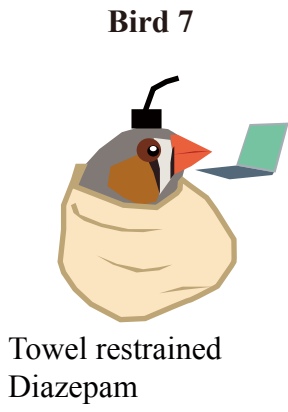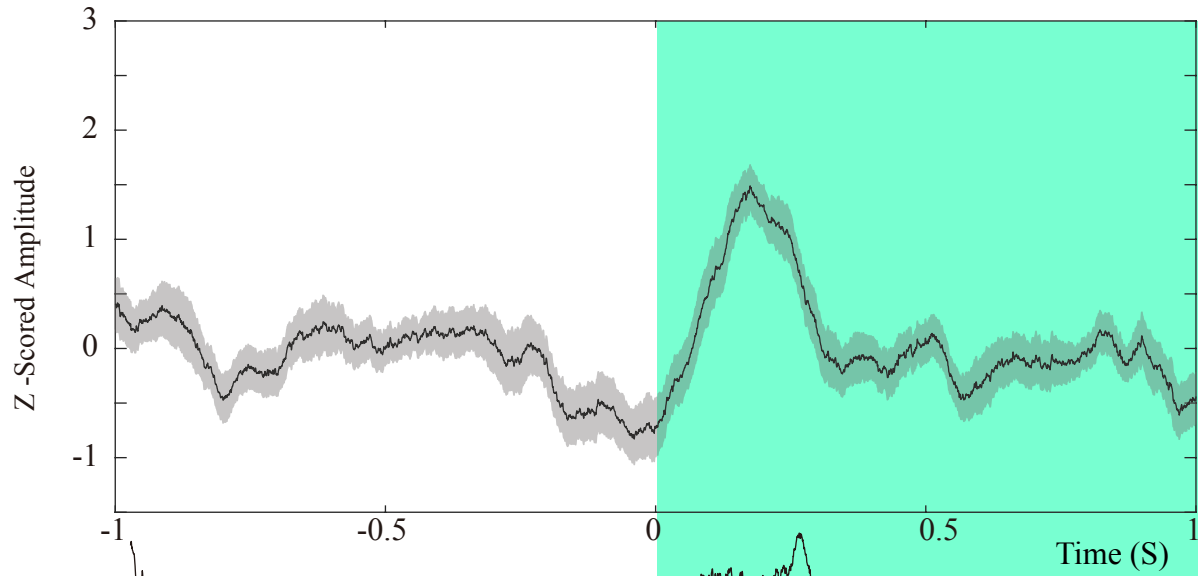

B.

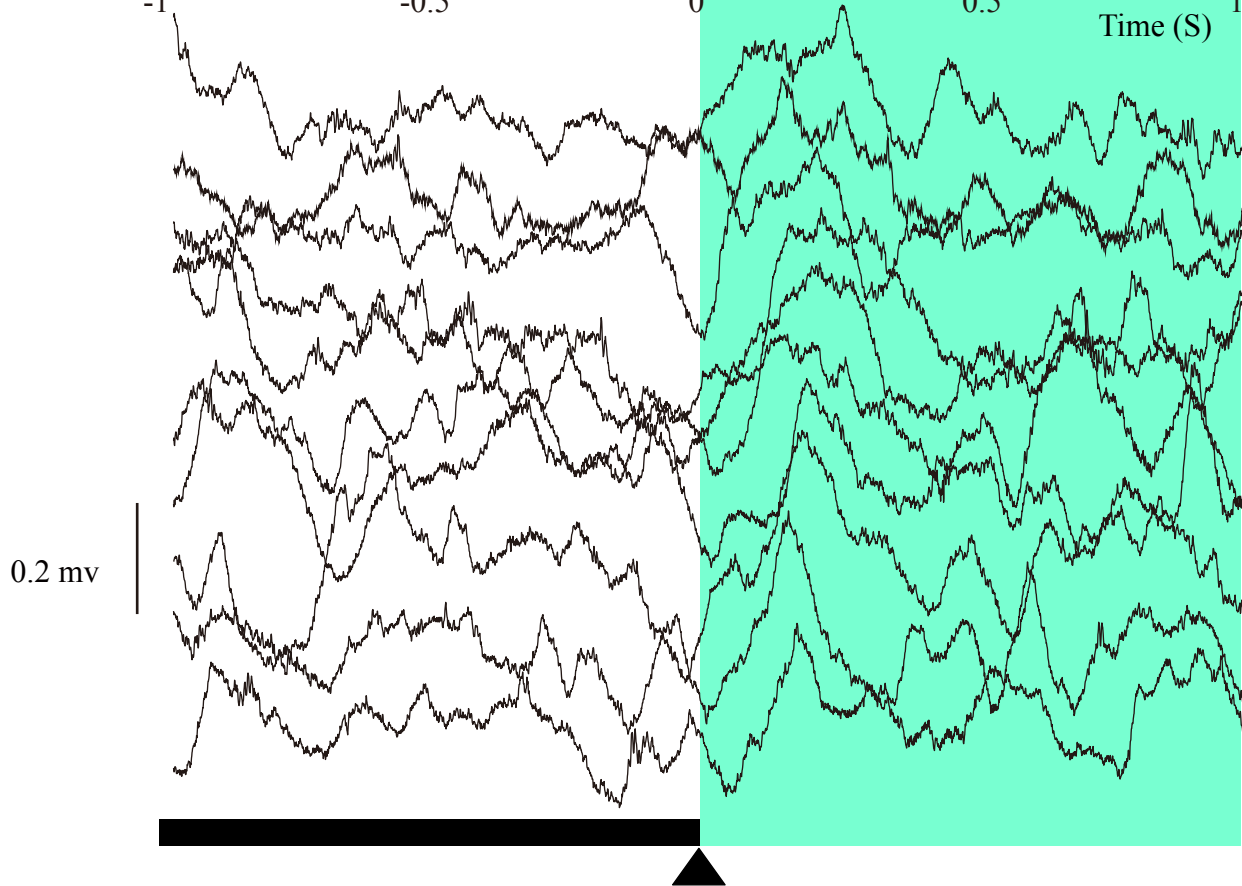

C.

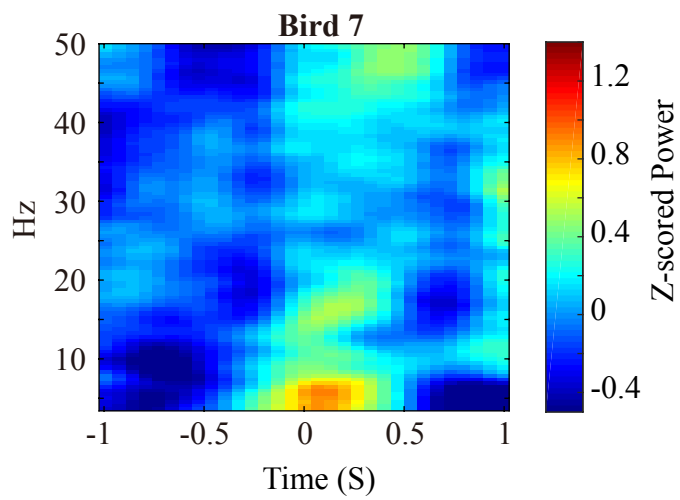

Supplement: Fig_S2.pdf [file Fig_S2.pdf]
