# Supplementary material for: Delayed evoked potentials in zebra finch ( Taeniopygia guttata ) under midazolam-butorphanol-isoflurane anesthesia
Source: PeerJ journal article supplement (doi:10.7717/peerj.7937), 2019-10-24

**Bird 5 (control)**

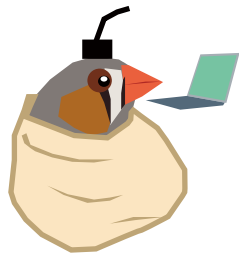

Towel restrained

**A**

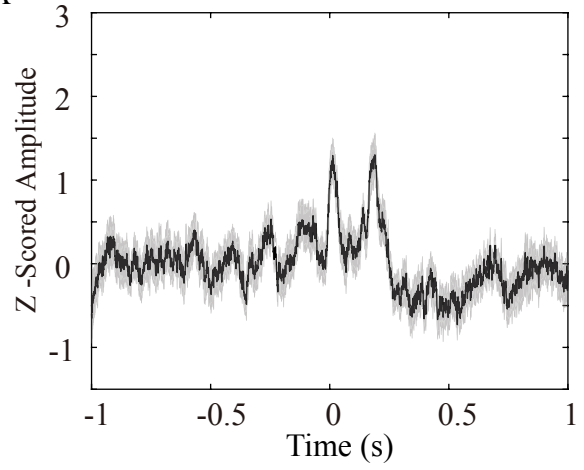

**B**

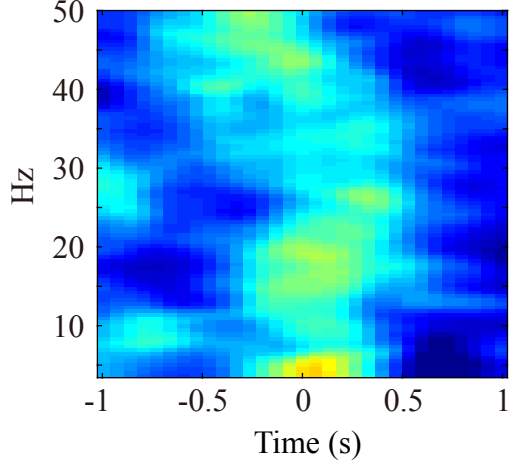

**C**

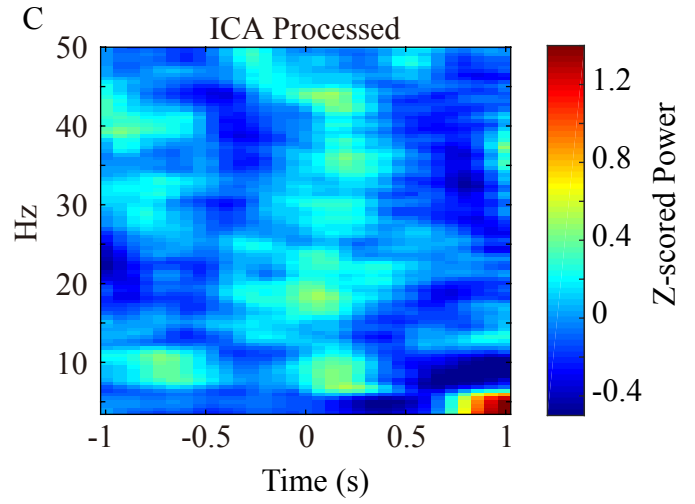

**Bird 6 (control)**

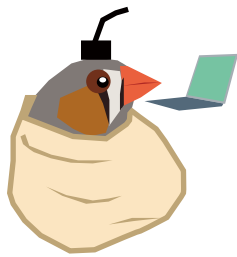

Towel restrained

**D**

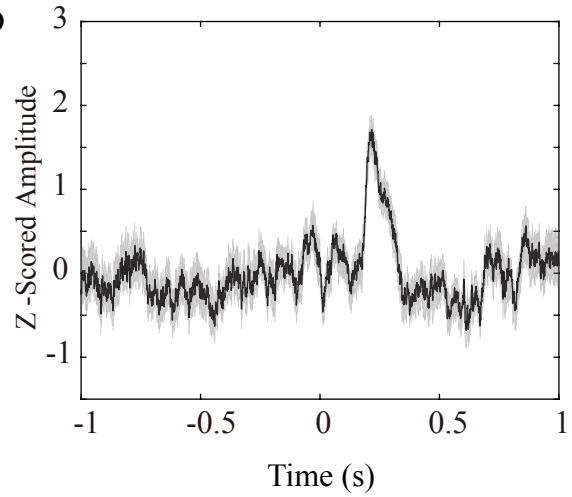

**E**

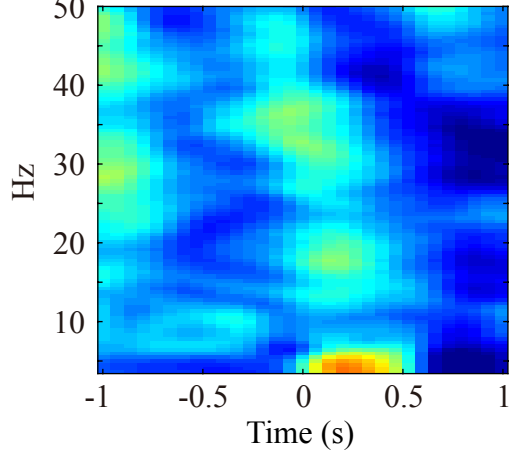

**F**

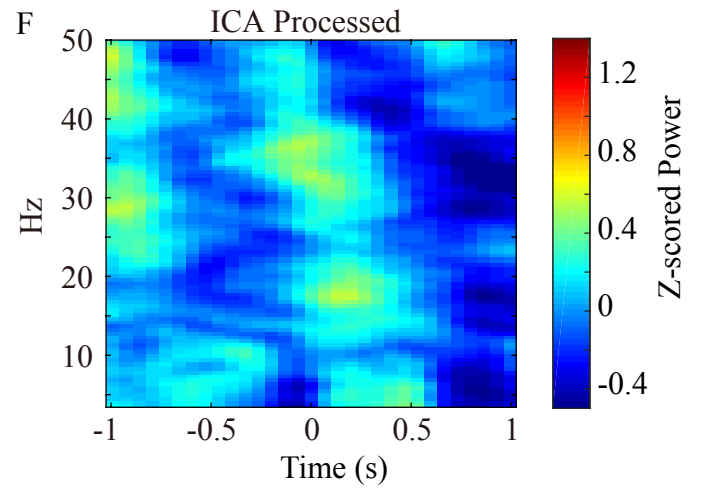

Supplement: Fig_S5.pdf [file Fig_S5.pdf]
